# Supplementary material for: Varespladib in the Treatment of Snakebite Envenoming: Development History and Preclinical Evidence Supporting Advancement to Clinical Trials in Patients Bitten by Venomous Snakes
Source: MDPI journal article supplement (doi:10.3390/toxins14110783), 2022-11-11
Supplement: s1 [file s1]

### **To prepare Varespladib Sodium *in situ* using Varespladib Free acid**

Basic data/information:

Varespladib-HCl (free Acid), MW: 380.4 (Anhydrous)

1 mg equals 2.63  $\mu\text{mol}$  (Active ingredient)

To prepare a concentration of 76.1mg/ml (200mM) sodium salt solution

Protocols:

1. Weigh 76.1mg (200  $\mu\text{mol}$ ) Varespladib-HCl, free acid, powder, into a vial
2. To the vial, add a 1.0 ml 0.2N NaOH (Sodium Hydroxide) aqueous solution (200  $\mu\text{mol}$  NaOH) to form a sodium salt of Varespladib. Swirl to dissolve (Should be dissolved instantaneously).

This a very concentrated Stock solution of Varespladid- $\text{Na}^+$ , ready to use.
